# Supplementary material
Source: PubMed Central journal article supplement (PMC7535919)
Supplement: supp_RA120.014976_161772_1_supp_573557_q66g0v.pdf [file supp_RA120.014976_161772_1_supp_573557_q66g0v.pdf]

## PDLIM5 inhibits STUB1-mediated degradation of SMAD3 and promotes the migration and invasion of lung cancer cells

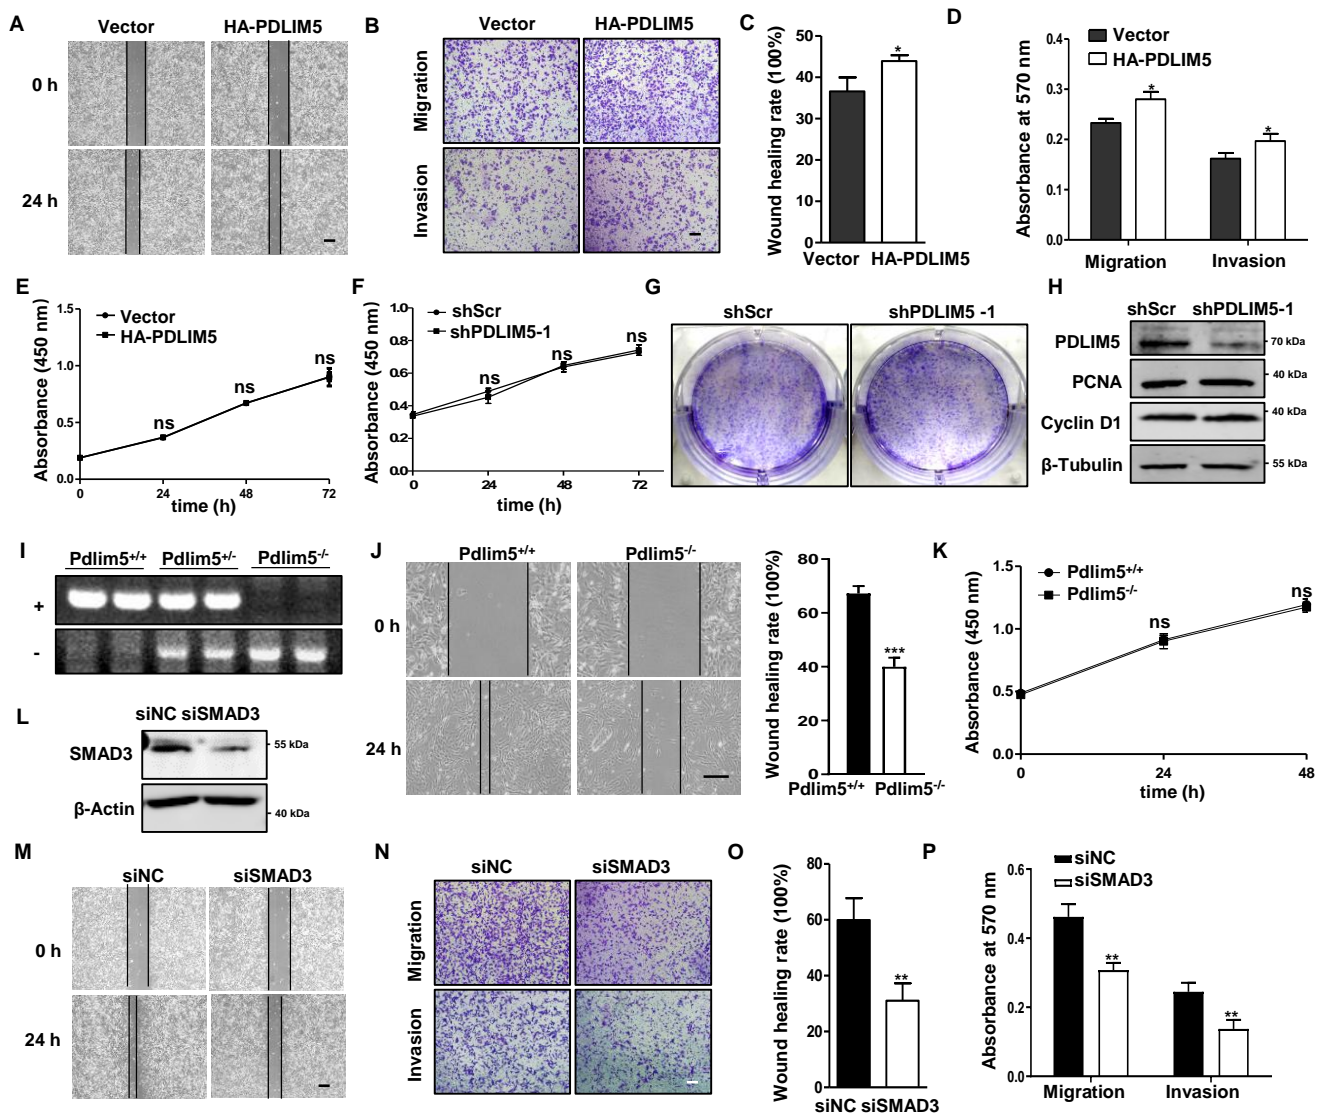

**Figure S1. PDLIM5 and SMAD3 promotes cell migration and invasion and PDLIM5 is not necessary for cell proliferation.** (A) Representative images of the wound-healing assay in *PDLIM5* overexpressed PC9 cells. Images were captured at 0 and 24 h after scratching. Scale bar: 200  $\mu$ m. (C) The wound-healing rate was analyzed by the Image J software (n = 3). (B) Representative images of transwell migration and transwell invasion assay for *PDLIM5* overexpressed PC9 cells. Scale bar: 200  $\mu$ m. (D) The migration and invasion index were quantified (n=3). (E, F) CCK8 assay was performed in *PDLIM5* overexpressed PC9 cells (E) and *PDLIM5* knockdown A549 cells (F) at indicated time (0 h, 24 h, 48 h, 72 h) (n = 3). (G) Representative images of clone formation assay of *PDLIM5* knockdown A549 cells. (H) Western blot analysis of PCNA and Cyclin D1 in *PDLIM5* knockdown A549 cells.  $\beta$ -Tubulin was used as a loading control. (I) PCR results showed *Pdlim5* wildtype and *Pdlim5* knockout allele. (J) Representative images of the wound-healing assay in *Pdlim5* wildtype (*Pdlim5*<sup>+/+</sup>) and *Pdlim5* knockout (*Pdlim5*<sup>-/-</sup>) mouse embryonic fibroblasts. Images were captured at 0 and 24 h after scratching. Scale bar: 200  $\mu$ m. The wound-healing rate was analyzed by the Image J software (n = 3). (K) CCK8 assay was performed in *Pdlim5* wildtype (*Pdlim5*<sup>+/+</sup>) and *Pdlim5* knockout (*Pdlim5*<sup>-/-</sup>) mouse embryonic fibroblasts at indicated time (0 h, 24 h, 48 h) (n = 3). (L) Western blot analysis of *SMAD3* knockdown efficiency in A549 cells. (M) Representative images of the wound-healing assay for *SMAD3* knockdown A549 cells. Images were captured at 0 and 24 h after scratching. Scale bar: 200  $\mu$ m. (O) The wound-healing rate was analyzed by the Image J software (n = 3). (N) Representative images of transwell migration and transwell invasion assay for *SMAD3* knockdown A549 cells. Scale bar: 200  $\mu$ m. (P) The migration and invasion index were quantified (n=3). Data were shown as mean  $\pm$  SD. Analysis was performed using two-tailed Student's t-test for C, D, J, O, P and one way ANOVA with Tukey post hoc test for E, F, K. \*  $p < 0.05$ , \*\*  $p < 0.01$ .

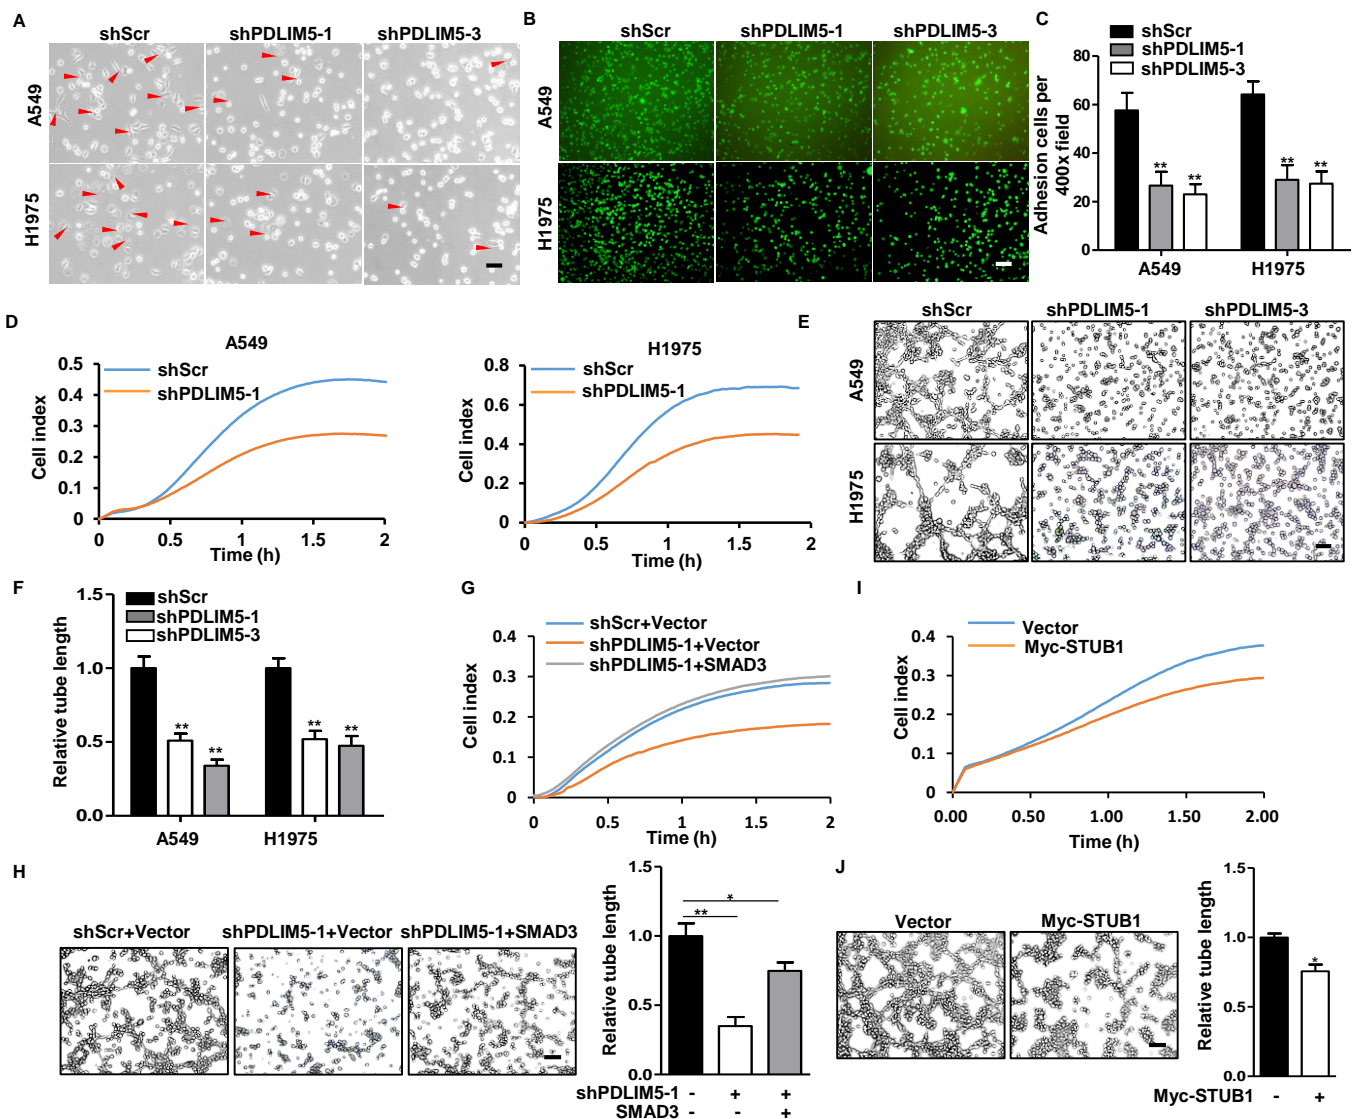

**Figure S2. *PDLIM5* knockdown and *STUB1* overexpression impair cell adhesion and vasculogenic mimicry, which were rescued by *SMAD3* overexpression.** (A) Spreading of *PDLIM5* knockdown A549 and H1975 cells after re-plating for 3 h. Arrows indicated spreading cells. Scale bar: 50  $\mu$ m. (B) Representative images of *PDLIM5* knockdown A549 and H1975 cells adhered to endothelial cells. Scale bar: 100  $\mu$ m. (C) the adhered cells were quantified (n = 4). (D) Adhesion of *PDLIM5* knockdown A549 and H1975 cells were recorded by a RTCA. (E) Representative images of the vasculogenic mimicry assay for *PDLIM5* knockdown A549 and H1975 cells. Scale bar: 100  $\mu$ m. (F) The tube length was analyzed by the Image J software (n = 4). (G) Adhesion of *PDLIM5* knockdown A549 cells with or without *SMAD3* overexpression were recorded by a RTCA. (H) Representative images of the vasculogenic mimicry assay of *PDLIM5* knockdown A549 cells, with or without *SMAD3* overexpression. Scale bar: 100  $\mu$ m. The tube length was analyzed by the Image J software (n = 4). (I) Adhesion of *STUB1* overexpressed A549 cells recorded by a RTCA. (J) Representative images of vasculogenic mimicry assay with *STUB1* overexpression in A549 cells. Scale bar: 100  $\mu$ m. The tube length was analyzed by using the Image J software (n=3). Data were shown as the mean  $\pm$  SD. Analysis was performed using two-tailed Student's t-test for C, F, J and one way ANOVA with Tukey post hoc test for H. \*  $p < 0.05$ , \*\*  $p < 0.01$

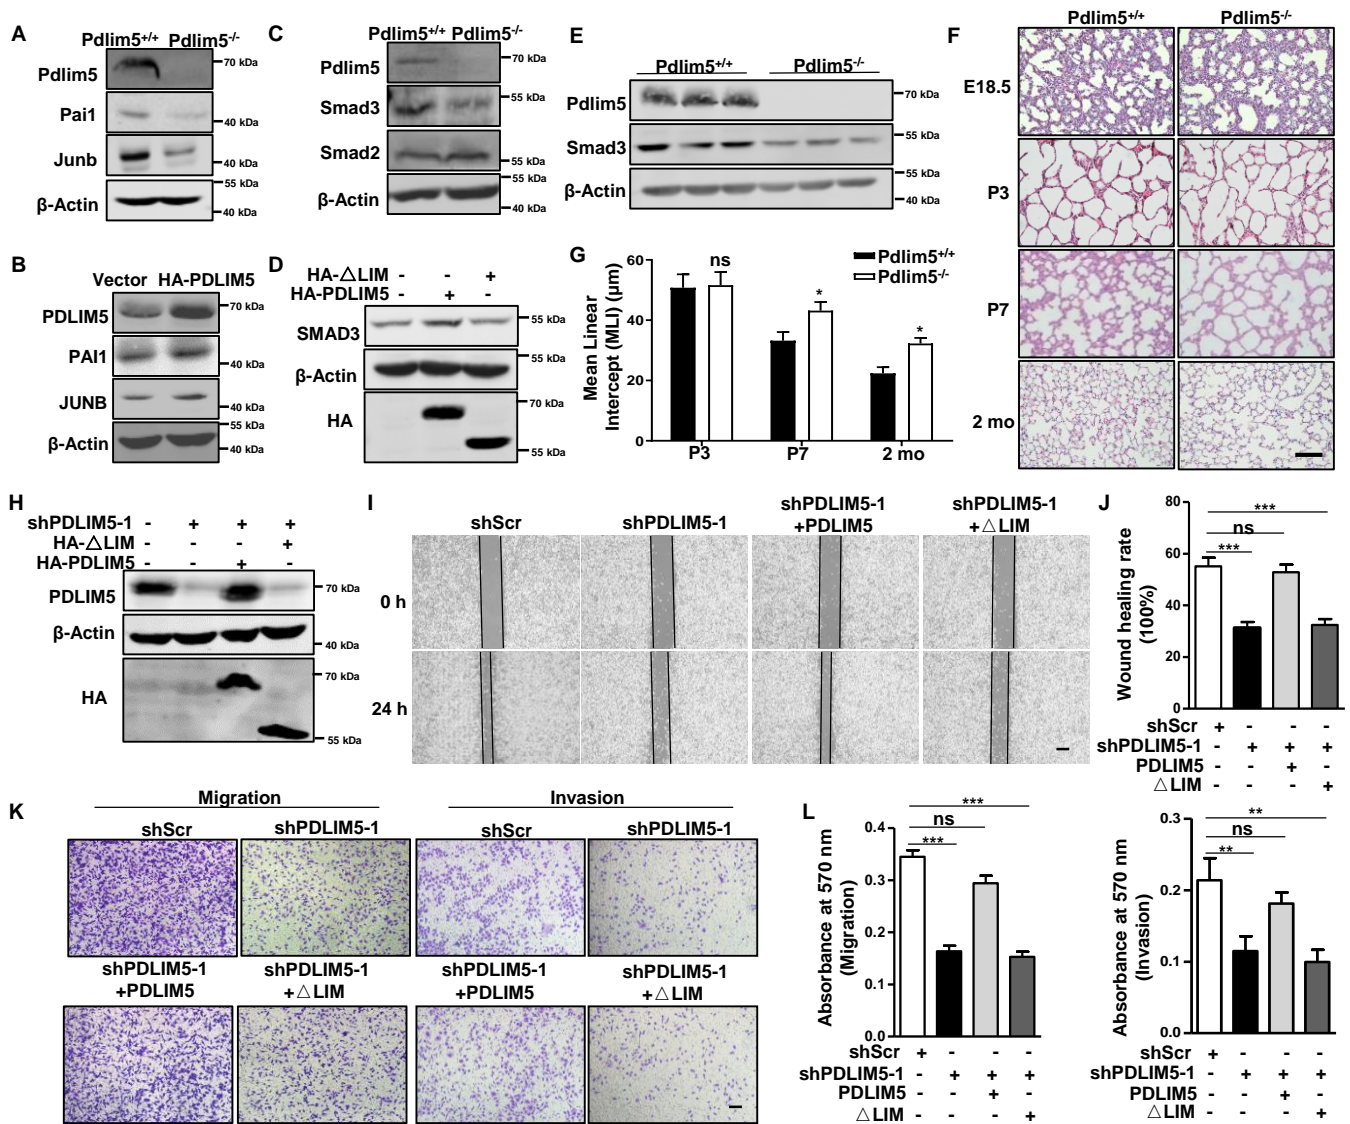

**Figure S3. SMAD3 mediates PDLIM5 function.** (A) Western blot analysis of Pai1 and Junb in *Pdlim5* wildtype (*Pdlim5*<sup>+/+</sup>) and *Pdlim5* knockout (*Pdlim5*<sup>-/-</sup>) mouse embryonic fibroblasts. β-Actin was used as a loading control. (B) Western blot analysis of PAI1 and JUNB in *PDLIM5* overexpressed PC9 cells. β-Actin was used as a loading control. (C) Western blot analysis of Smad2 and Smad3 in *Pdlim5* wildtype (*Pdlim5*<sup>+/+</sup>) and *Pdlim5* knockout (*Pdlim5*<sup>-/-</sup>) mouse embryonic fibroblasts. β-Actin was used as a loading control. (D) Western blot analysis of SMAD3 in *PDLIM5* full-length and LIM-domain deletion mutant overexpressed PC9 cells. β-Actin was used as a loading control. (E) Western blot analysis of *Pdlim5* and Smad3 in the left lungs of *Pdlim5* wildtype (*Pdlim5*<sup>+/+</sup>) and *Pdlim5* knockout (*Pdlim5*<sup>-/-</sup>) mice. β-Actin was used as a loading control (n = 3). (F) Hematoxylin and eosin staining for lung sections from *Pdlim5* wildtype (*Pdlim5*<sup>+/+</sup>) and *Pdlim5* knockout (*Pdlim5*<sup>-/-</sup>) mice. The lung was collected from E18.5 embryos and postnatal 3 days, 7 days, and 2 months. Each group contained 3 or 4 embryos or mice. Scale bar: 50 μm. (G) Quantitative analyses of the pulmonary alveolar sizes through measuring mean linear intercept (MLI). (H) Western blot analysis of *PDLIM5* levels in *PDLIM5* knockdown cells, with *PDLIM5* full-length or LIM-domain deletion mutant overexpression. β-Actin was used as a loading control. (I) Representative images of the wound healing assay of *PDLIM5* knockdown A549 cells with *PDLIM5* full-length and LIM-domain deletion mutant overexpression. Images were captured at 0 and 24 h after scratching. Scale bar: 200 μm. (J) The wound-healing rate was analyzed by the Image J software (n = 3). (K) Representative images of the transwell migration and invasion assay of *PDLIM5* knockdown A549 cells with *PDLIM5* full-length and LIM-domain deletion mutant overexpression. Scale bar: 200 μm. (L) The migration and invasion index were quantified (n = 3). Data were shown as mean ± SD. Analysis was performed using one way ANOVA with Tukey post hoc test for J, L. \* *p* < 0.05, \*\* *p* < 0.01, \*\*\* *p* < 0.001.

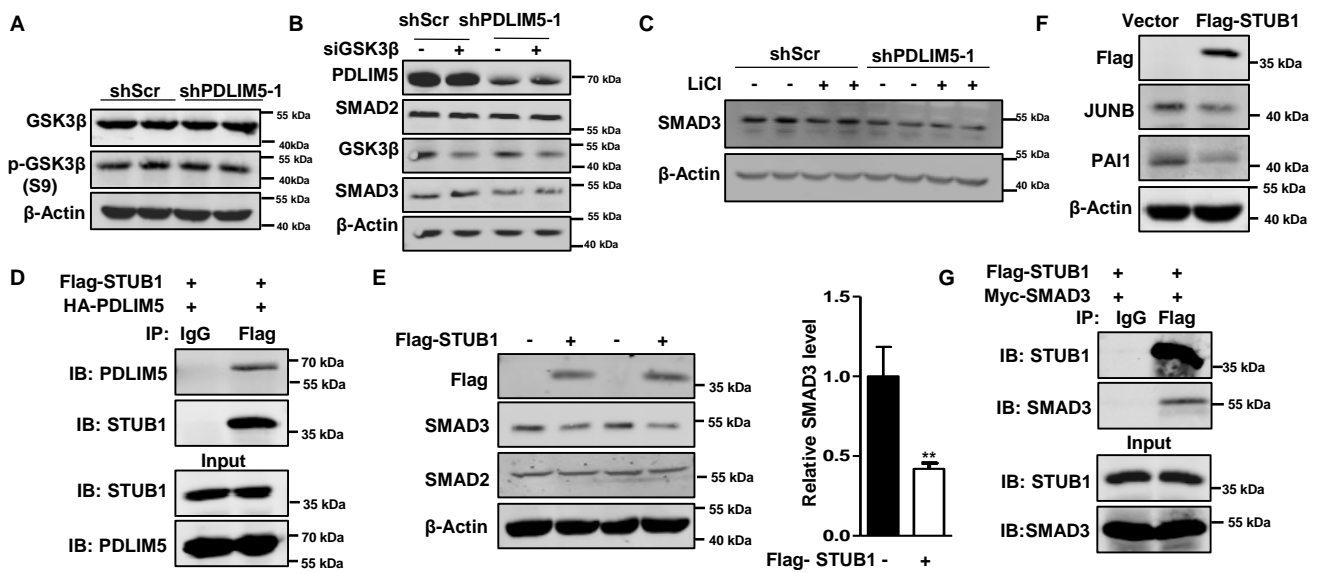

**Figure S4. GSK3β is not responsible for *PDLIM5*-knockdown induced SMAD3 degradation, and *STUB1* overexpression inhibits TGFβ signaling.** (A) Western blot analysis of GSK3β and phosphorylated GSK3β (p-GSK3β) in *PDLIM5* knockdown A549 cells. β-Actin was used as a loading control. (B) Western blot analysis of SMAD3 in *PDLIM5* knockdown A549 cells, with or without *GSK3β* knockdown. β-Actin was used as a loading control. (C) Western blot analysis of SMAD3 in *PDLIM5* knockdown A549 cells, with or without LiCl (inhibitor for GSK3β) treatment. β-Actin was used as a loading control. (D) Co-immunoprecipitation analysis of the interaction between PDLIM5 and STUB1 in HEK293T cells. (E) Western blot analysis of SMAD3 and SMAD2 in A549 cells transfected with Flag-STUB1 expressing vector. SMAD3 levels were quantified and normalized to the control (n = 3). β-Actin was used as a loading control. (F) Western blot analysis for PAI1 and JUNB in *STUB1* overexpressed A549 cells. β-Actin was used as a loading control. (G) Co-immunoprecipitation analysis of the interaction between STUB1 and SMAD3 in HEK293T cells. Data were shown as mean ± SD. Analysis was performed using two-tailed Student's t-test for E. \*  $p < 0.05$ .

Supplementary Table S1. The target sequence of shRNA and siRNA

|                  |                                                                 |
|------------------|-----------------------------------------------------------------|
| shPDLIM5-1       | CCGGTGTTAGGTAGTTATGAGTAAACTCGAGTTTACTCATAACTACCT<br>AACATTTTTTG |
| shPDLIM5-2       | CCGGCGCCCATTTGTAACCAGGTCATCTCGAGATGACCTGGTTACAATG<br>GGCGTTTTT  |
| shPDLIM5-3       | CCGGTGTTAGGTAGTTATGAGTAAACTCGAGTTTACTCATAACTACCT<br>AACATTTTTTG |
| shPdlim5 (Mouse) | CCGGCTGCATGTTAGTGCCAATCTTCTCGAGAAGATTGGCACTAACAT<br>GCAGTTTTTG  |
| siGSK3 $\beta$   | 5'-GAUCUGUCUUGAAGGAGAATT-3'                                     |
| siSTUB1          | 5'-CCCAAGTTCTGCTGTTGGACTCT-3'                                   |

Supplementary Table S2. Antibody

| Antibody                              | Cat number | Dilution                     | Source | Company        |
|---------------------------------------|------------|------------------------------|--------|----------------|
| Anti-PDLIM5                           | ab196559   | WB: 1:1000; IF/IHC/IP: 1:100 | Rabbit | Abcam          |
| Anti-Flag                             | AF519      | WB: 1:1000; IP: 1:100        | Mouse  | Beyotime       |
| Anti-Flag                             | #14793     | WB: 1:1000; IP: 1:100        | Rabbit | Cell Signaling |
| Anti-Myc                              | TA150121   | WB: 1:1000; IP: 1:100        | Mouse  | ORIGENE        |
| Anti-HA                               | E022010    | WB: 1:1000; IP: 1:100        | Mouse  | EarthOx        |
| Anti-PCNA                             | #13110     | WB: 1:1000                   | Rabbit | Cell Signaling |
| Anti-Cyclin D1                        | #2922      | WB: 1:1000                   | Rabbit | Cell Signaling |
| Anti-PAI                              | 13801-1-AP | WB: 1:1000                   | Rabbit | proteintech    |
| Anti-JunB                             | 10486-1-AP | WB: 1:1000                   | Rabbit | proteintech    |
| Anti-Vimentin                         | #5741      | WB: 1:1000                   | Rabbit | Cell Signaling |
| Anti-E-Cadherin                       | #3195      | WB: 1:1000                   | Rabbit | Cell Signaling |
| Anti-p-SMAD2                          | #18338     | WB: 1:1000                   | Rabbit | Cell Signaling |
| Anti-p-SMAD3                          | #9520      | WB: 1:1000                   | Rabbit | Cell Signaling |
| Anti-SMAD2                            | #5339      | WB: 1:1000                   | Rabbit | Cell Signaling |
| Anti-SMAD3                            | #9523      | WB: 1:1000                   | Rabbit | Cell Signaling |
| Anti-Snail1                           | A5544      | WB: 1:1000                   | Rabbit | Abclonal       |
| Anti-SMAD4                            | #46535     | WB: 1:1000                   | Rabbit | Cell Signaling |
| Anti-SMAD7                            | sc-11392   | WB: 1:1000                   | Rabbit | Santa Cruz     |
| Anti-TGF $\beta$ R1                   | sc-398     | WB: 1:1000                   | Rabbit | Santa Cruz     |
| Anti-GSK3 $\beta$                     | 22104-1-AP | WB: 1:1000                   | Rabbit | proteintech    |
| Anti-p-GSK3 $\beta$                   | ab107166   | WB: 1:1000                   | Rabbit | Abcam          |
| Anti-SMAD3                            | sc-101154  | IF:1:100                     | Mouse  | Santa Cruz     |
| Anti-STUB1                            | 55430-1-AP | WB: 1:1000                   | Rabbit | proteintech    |
| Anti-HA                               | db5297     | WB: 1:1000                   | Rabbit | Diagbio        |
| Anti- $\beta$ -Actin                  | M1210-2    | WB: 1:5000                   | Mouse  | HuaBio         |
| 800CW Goat anti-Rabbit (WB)           | 925-32211  | 1:5000                       | Goat   | LI-COR         |
| 680RD Goat anti-Mouse (WB)            | 925-68070  | 1:5000                       | Goat   | LI-COR         |
| Goat anti-Rabbit, Alexa Fluor546 (IF) | A-11035    | 1:200                        | Goat   | ThermoFisher   |
| Goat anti-Mouse, Alexa Fluor 488 (IF) | A-11001    | 1:200                        | Goat   | ThermoFisher   |

Supplementary Table S3. The primers used for RT-PCR analysis

| Primer Name | Primer Sequence 5'-3'     |
|-------------|---------------------------|
| CDH1-F      | TGGGCCAGGAAATCACATCCTACA  |
| CDH1-R      | TTGGCAGTGTCTCTCCAAATCCGA  |
| CDH2-F      | TGTGGGAATCCGACGAATGGATGA  |
| CDH2-R      | TGGAGCCACTGCCTTCATAGTCAA  |
| Vim-F       | AGAACCTGCAGGAGGCAGAAGAAT  |
| Vim-R       | TTCCATTTACGCATCTGGCGTTC   |
| PAI1-F      | GGCTGACTTCACGAGTCTTTCA    |
| PAI1-R      | ATGCGGGCTGAGACTATGACA     |
| SMA-F       | ACCCGCCAGAACTAGACACAAT    |
| SMA-R       | TCGCCACGTAGGAATCTTTCTGA   |
| Zeb1-F      | ATACCTGTGAATGGGCGACCAAGA  |
| Zeb1-R      | ACTGCCTGGTGATGCTGAAAAGAGA |
| Snail1-F    | ACTGCAACAAGGAATACCTCAG    |
| Snail1-R    | GCACTGGTACTTCTTGACATCTG   |
| FN-F        | GGCTGAAGACACAAGGAAATAAG   |
| FN-R        | CATTTGAGTTGCCACCGTAAG     |
| PDLIM5-F    | TCCTTGAGAGAAGTCATCAATGC   |
| PDLIM5-R    | CACCATCCTCCAAGTGAAAAAC    |
| SMAD2-F     | CGTCCATCTTGCCATTCACG      |
| SMAD2-R     | CTCAAGCTCATCTAATCGTCCTG   |
| SMAD3-F     | TGGACGCAGGTTCTCCAAAC      |
| SMAD3-R     | CCGGCTCGCAGTAGGTAAC       |
| SMAD5-F     | GGCCGGATTTGCAGAGTCAT      |
| SMAD5-R     | AGAATCTGGAAACGTGGCATT     |
| 18S-F       | GTAACCCGTTGAACCCATT       |
| 18S-R       | CCATCCAATCGGTAGTAGCG      |
